# Supplementary material
Source: publisher figshare collection journal article supplement (https://tandf.figshare.com/ndownloader/files/15158189)
Supplement: Supplementary file 1 [file 15158189]

## Supplementary material

### 12OHJA, 12OGlcJA, and JA-L-Val as airborne MeJA metabolites

Katsunari Oki, Rishni Masimbula, Kanji Miyawaki, Yusuke Takata, Kosaku Takahashi, and Hideyuki Matsuura

Laboratory of Natural Product Chemistry, Division of Fundamental AgriScience Research, Research Faculty of Agriculture, Hokkaido University, Sapporo 060-8589, Japan

### Table of Contents

**Figure 1S.** Evaluation of the metabolites derived from airborne MeJA using a semi-closed container.

**Figure 2S.** UPLC MS/MS chromatograph analyzing (-)-JA-L-Ile and JA-L-Ile.

**Figure 3S.** UPLC MS/MS chromatograph analyzing (-)-JA-L-Val and JA-L-Val.

**Figure 4S.** UPLC MS/MS chromatograph analyzing JA-L-Ile.

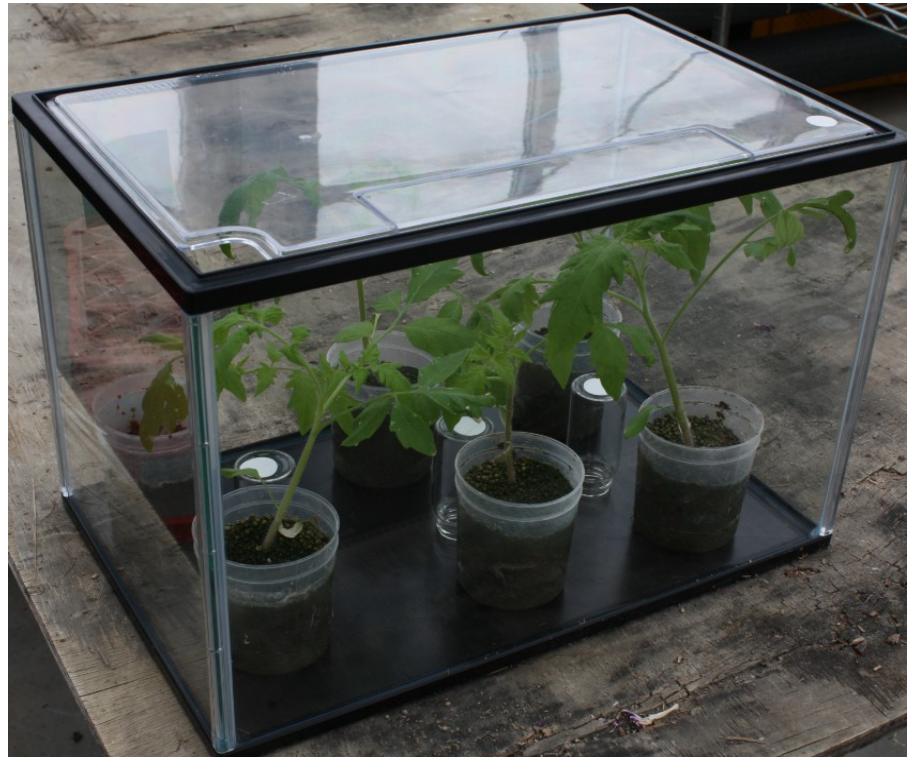

**Figure 1S.** Evaluation of the metabolites derived from airborne MeJA using a semi-closed container.

Size of the container: 25 x 28 x 40 cm<sup>3</sup>

A)

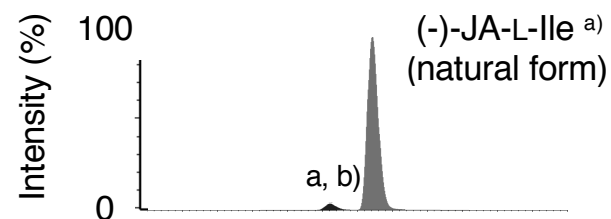

B)

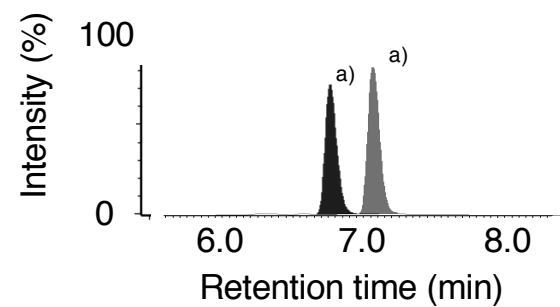

**Figure 2S.** UPLC MS/MS chromatograph analyzing (-)-JA-L-Ile and (±)-JA-L-Ile.

A) Analyzing (-)-JA-L-Ile synthesized from (-)-JA, B) Analyzing JA-L-Ile synthesized from (±)-JA and L-Ile.

a) The peak was monitored by selecting  $m/z$  322.03 as the pseudo molecular ion and  $m/z$  129.68 as the transition ion.

b) The peak derived from *cis* form of (-)-JA-L-Ile, namely (3*R*, 7*S*) JA-L-Ile

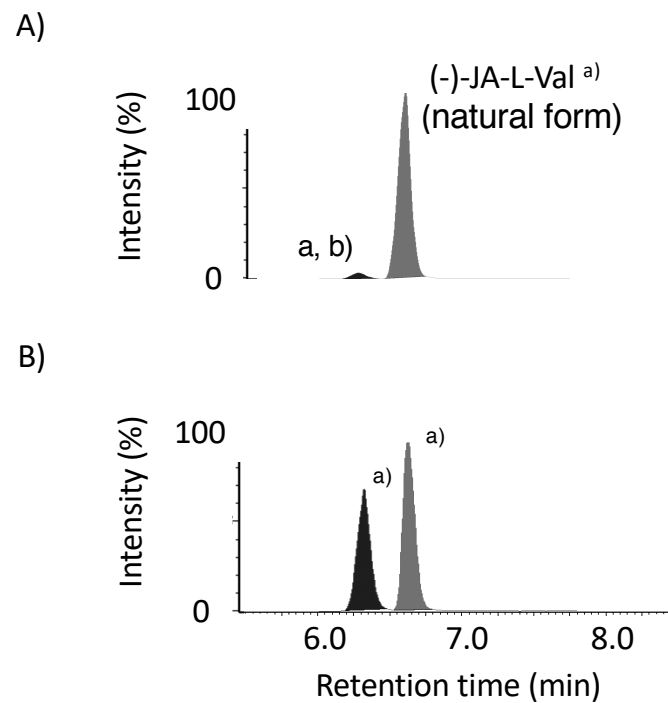

**Figure 3S.** UPLC MS/MS chromatograph analyzing (-)-JA-L-Val and (±)- JA-L-Val.

A) Analyzing (-)-JA-L-Val synthesized from (-)-JA, B) Analyzing JA-L-Val synthesized from (±)-JA and L-Val.

a) The peak was monitored by selecting  $m/z$  308.03 as the pseudo molecular ion and  $m/z$  115.58 as the the transition ion.

b) The peak derived from *cis* form of (-)-JA-L-Val, namely (3*R*, 7*S*) JA-L-Val

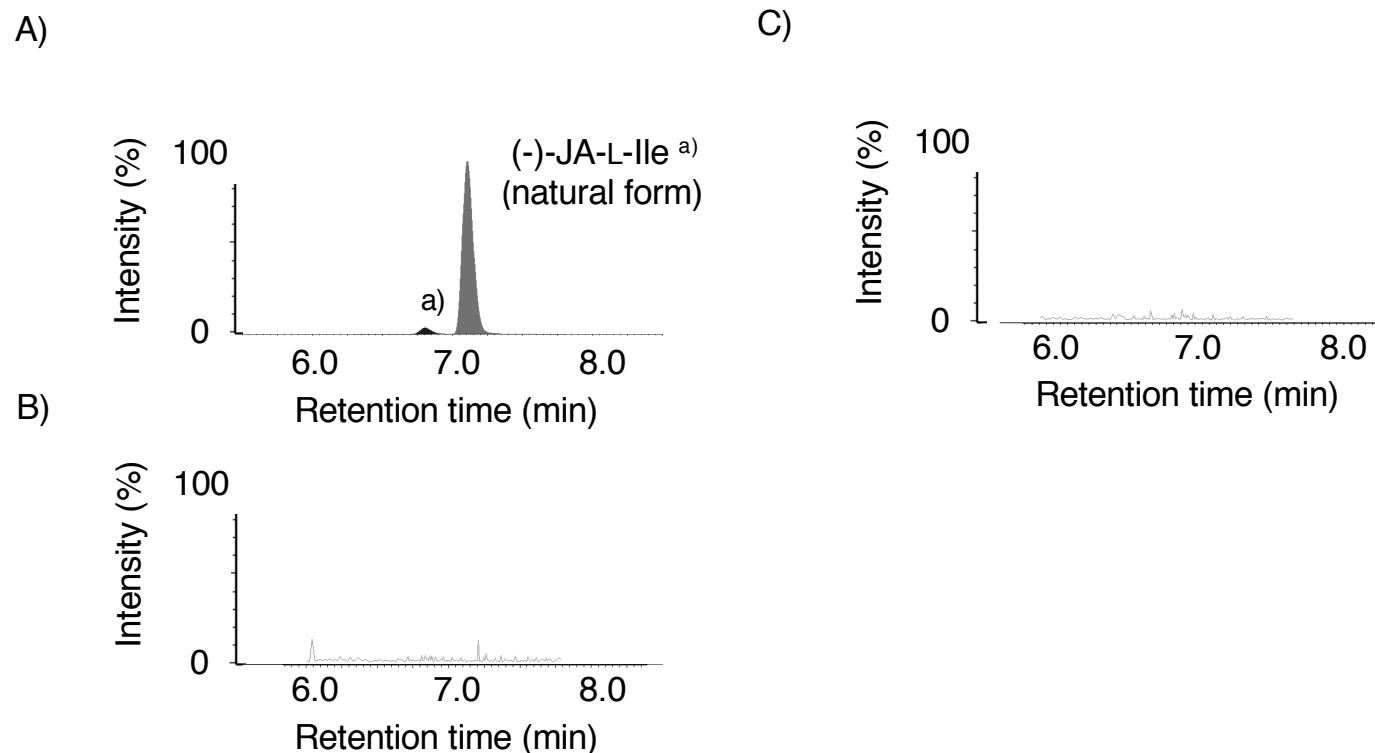

**Figure 4S.** UPLC MS/MS chromatograph analyzing JA-L-Ile.

A) Analyzing (-)-JA-L-Ile synthesized from (-)-JA. The peaks were monitored by selecting  $m/z$  322.03 as the pseudo molecular ion and  $m/z$  129.68 as the the transition ion. B) Analyzing (-)-JA-L-Ile-d<sub>5</sub> in the sample derived from (-)-MeJA non-treated plants. The peak was monitored by selecting  $m/z$  327.03 as the pseudo molecular ion and  $m/z$  129.68 as the the transition ion. C) Analyzing (-)-JA-L-Ile-d<sub>4</sub> in the sample derived from (-)-MeJA non-treated plants. The peaks were monitored by selecting  $m/z$  326.03 as the pseudo molecular ion and  $m/z$  129.68 as the the transition ion.
